# Supplementary material for: Twin physically unclonable cryptographic primitives enabled by aligned carbon nanotube arrays
Source: Research Square preprint supplement (doi:10.21203/rs.3.rs-702485/v1), 2021-08-16
Supplement: Supplementary file 1 [file 85a6434ac35e3412a55f871c.docx]

Supplementary Information for

**Twin physically unclonable cryptographic primitives enabled by aligned carbon nanotube arrays**

Donglai Zhong, Jingxia Liu,Mengmeng Xiao, Yunong Xie, Huiwen Shi, Lijun Liu, Chenyi Zhao, Li Ding, Lian-Mao Peng* , and Zhiyong Zhang*

Key Laboratory for the Physics and Chemistry of Nanodevices and Center for Carbon-based Electronics, Department of Electronics, Peking University, Beijing 100871, China

*Correspondence to: zyzhang@pku.edu.cn; lmpeng@pku.edu.cn.

**Materials and Methods**

1. **CNT growth and transfer.**

Well-aligned CNT arrays were grown on quartz substrates. ST-cut (Hoffman Inc.) quartz wafers were annealed at 900 °C for 9 h to improve the crystallinity. Standard UV photolithography was performed to pattern catalyst stripes with a width of 5 μm and a spacing of 250 μm. The catalyst stripes were patterned perpendicular to [2, -1, -1, 0] of the quartz surface. An iron film with a thickness of approximately 0.1 nm was deposited as catalyst layer using an electron beam evaporator, followed by a lift-off process. CNT growth was performed in a horizontal CVD furnace. The prepared substrate with patterned catalyst was annealed at 800 °C for 1 h in air to oxidize the catalysts and to remove the remaining polymer residue from the photolithography process. After cooling to room temperature, the furnace was again heated to 800 °C in 30 min under the protection of Ar (500 sccm) before CNT growth. In a typical CVD growth process of CNTs, H2/Ar (50 sccm/50 sccm) was used to reduce the catalyst for 10 min at 800 °C. Subsequently, an Ar flow of ~50 sccm through an ethanol bubbler and a hydrogen flow of ~50 sccm were introduced into the CVD furnace for 23 min for CNT growth. The system was then cooled to room temperature in Ar atmosphere to finish the growth process.

PMMA films were used as medium to transfer CNT arrays from quartz substrate onto the target Si/SiO2 structure. The substrate with CNT arrays was covered with a photoresist film by spin coating and then dried at room temperature. An open-box tape was attached to the photoresist film for avoiding fracture, and then the substrate was immersed in hydrofluoric acid buffer. After being automatically released from the substrate, the photoresist film with CNTs was took out and immersed into deionized water for removing the remains of hydrofluoric acid buffer. Then a drop of water was dropped on the target substrate and the photoresist film was put on the water drop. After the water drop being dried and the photoresist film firmly attached, the new substrate with the photoresist film and CNTs was immersed into acetone, N-Methyl-2-pyrrolidone (NMP), acetone and alcohol for 20 minutes each and then dried using high-purity nitrogen to finish a CNT film transfer process.

**2.The** **fabrication and Measurement of twin PUFs.**

CNT FETs in twin PUFs were fabricated with back-gate structure. Pd/Au stack metal films of about 20/60 nm were firstly deposited via electron beam evaporation (EBE) on CNT arrays in order to achieve ohmic contact to CNTs. Unwanted CNTs were etched by RIE to form independent channels. Ti/Au stack metal films of about 20/100 nm were deposited as connected wires and testing pads. The as fabricated CNT FETs were measured using a probe station (Cascade Summit 1100) and a semiconductor analyzer (Keithley 4200).

**3. Extraction of CNT pitch and fitting.**

The extraction of CNT pitch includes three steps: (1) Read the gray values perpendicular to the CNT growth direction in the SEM image of CNT arrays; (2) Locate CNT positions by finding local maximum values; (3) Calculate CNT pitches by subtraction between adjacent CNT positions. We used normal distribution, logistic distribution, and lognormal distribution etc. to fit the experiment data, and found lognormal distribution has the best fitting. Figure S6 shows the results of four samples with different CNT densities, in which c and d are extracted from literature. A variable X is lognormally distributed if Y=ln(X) is normally distributed, and the probability density function (PDF) and cumulative distribution function (CDF) of lognormal distribution are given by

, (1)

, (2)

respectively, where σ and μ are parameters, *x* is a random variable, and erfc is the complementary error function. Specifically, the arithmetic mean and standard deviation of a log-normally distributed variable X are given by

, (3)

, (4)

respectively, where E and SD are arithmetic mean and standard deviation. Conversely, the parameters μ and σ can be obtained from the arithmetic mean and standard deviation, and given by

, (5)

, (6)

respectively.

**4. The randomness of CNT arrays.**

The randomness of CNT PUFs comes from the randomness of CNT arrays themselves including position and charity. As shown in Fig. S2, CNT pitches are randomly distributed and the adjacent pitch differences follow a normal distribution, which means there is little influence of one pitch on adjacent pitches. As shown in Fig. S3, from the AFM image of CNT arrays, we extracted the diameters along with tubes, and the diameters are also randomly distributed perpendicular to the CNT growth direction.

**5. Simulation of PUFs on CNT arrays.**

CNT arrays are simulated using three parameters: the mean of CNT pitch, the standard deviation of CNT pitch and the metallic/semiconducting ratio (MSR). Through the equation (5) and (6), the parameters μ and σ can be obtained to generate a set of data (CP), and to generate CNT positions by accumulating CPs. The generated CNTs are semiconducting with a probability of 1/(1+MSR), and the others are metallic. The FETs are simulated with different channel width (Wch) and a spacing of 5 μm. Fig. S7 shows the illustration of a simulated CNT array and FETs, given parameters: CP=2±1.5 μm, MSR=1:2, and Wchs are 0.5 μm, 1 μm and 2 μm.

According to the electrical properties, CNT FETs can be classified into three types: O type (without CNTs in the channel), S type (only semiconducting CNTs in the channel) and M type (at least one metallic CNT in the channel). We simulated 3×105 FETs for every different Wchs, changing from 0 to 4 μm with a step of 0.1 μm (CP=1±0.5 μm and MSR=1/2), and calculated the relation of the probabilities of three type FETs with Wch as shown in Fig. S7a. With Wch increasing, the ratios of O-, S- and M-type FETs decreases monotonously, firstly increases and then decreases, and increases monotonously, respectively. The nonmonotonic change of the ratio of S-type FETs comes from the rapid increase of FETs having mixed semiconducting and metallic CNTs in the channel when Wch exceeding 1 μm (Fig. S7b).

**6. Optimization of ternary keys**

O-, S- and M-type FETs should be tuned to be have equal probability of 1/3 to realize an ideal ternary keys. This optimization requires the ratio-Wch curves of three type FETs have the same intersections, which can be simplified to another task that the longitudinal coordinate of the intersection of two of the curves is equal to 1/3. We selected O- and M-type FETs to study it, because the ratios of them change monotonously.

As shown in Fig. S8, we simulated the ratio-Wch curves with different metallic CNT ratio (MR, CP=1±0.5 μm). With the MR increasing from 0.3 to 0.6, the ratio of M-type FETs increases, while the ratio of O-type FETs keep constant. When the MR is about 0.48, the longitudinal coordinate of the intersection of two of the curves is closest to 1/3. As shown in Fig. S9, we simulated the ratio-Wch curves with different standard deviations (MR=1/3, the mean of CP=1 μm). With the standard deviation increasing from 0.1 to 0.9, the ratio of M-type FETs decreases slightly, while the ratio of O-type FETs increases largely. When the MR is increasing, the longitudinal coordinate of the intersection of two of the curves is closer to 1/3.

In order to study the influence of both standard deviation and MR on the optimized target, we define the minimal difference (MD) as sum of square difference between the ratios of O-, S- and M-type FETs and the ideal value (1/3) for a given CP and MR. The MD is given by

, (7)

where *R*O, *R*S and *R*M represent the ratios of O-, S- and M-type FETs, respectively, and are the functions of Wch. We used coefficient of variation (Cov) to replace standard deviations to do the simulation in order to be more universal. We simulated MD with Cov from 0.4 to 1 and MR from 0.2 to 0.7, as shown in Fig. S10. Through co-optimization of CP and MR, MD can be reduced to smaller than 10-4, and our work give MD close to 10-4.

**7. The extraction of metallic ratio of CNT arrays.**

The most common way based on the electrical measurement to extract metallic ratio (MR) or semiconducting ratio (SR) is to calculate on/off ratio (OR) from the transfer characteristic curves of FETs with a wide channel on CNT array. The MR and SR are given by

, (8)

, (9)

respectively. We used this method to extract MR of the CNT arrays used in PUFs to be 38 %, as shown in Fig. 11a. This method is based on a hypothesis that the on-state current of a semiconducting tube is equal to that of a metallic CNT, however, this hypothesis is not accurate, since the metallic CNTs have large on-state currents.

We designed another method to more accurately extract MR/SR of CNT arrays in which many small FETs are used. The channel needs to be narrow enough to make sure that the number of CNTs in the channel is not larger than one, then *R*M/*R*S will be equal to MSR. MR and SR are given by

, (10)

, (11)

respectively. According to the simulation shown in Fig. S8, the ratio of the mixed M/S FETs is close to zero when Wch is smaller than about 500 nm. As shown in Fig. S11b, we calculate *R*M/(*R*S +*R*M), and used the data with Wch from 100 nm to 500 nm to fit the MR of about 43 %.

**8. The calculation of possible combination number.**

The possible combination numbers of ternary keys and binary keys are given by

, (12)

, (13)

respectively, where n, c, s, m and o represent the number of all FETs, connected FETs, S-type FETs, M-type FETs and O-type FETs, respectively. We calculated CN3 changing s and m and keeping n a constant, and found CN3 reach maximum value when . Fabricating a 300-bit ternary key, our PUF gives (s, m) of (103, 97) making CN3 reach 3.44×10140, while the PUF from the literature gives (s, m) of (69, 80) making CN3 reach 2.90×10132. As shown in Fig. S14, we also compared maximum CN of ternary keys and binary keys with the same key size, and ternary keys have much larger CN.

**9. Inter hamming distance and intra hamming distance.**

The uniqueness and reliability of a PUF are characterized by inter hamming distance and intra hamming distance, respectively, and the means of normalized inter HD and intra HD are given by

, (14)

, (15)

respectively, Si and Sj are the i-th key and j-th key extracted from CNT PUFs, respectively, is the i-th key extracted from CNT PUFs at different time or different environment, where *K* is the size of one key, *N* is the total number of keys. For an ideal multivariate key with *M* choice in one bit, the expectation of inter HD is equal to , so the mean of normalized inter HD is given by

. (16)

The means of normalized inter HD of ideal ternary keys and binary keys are 2/3 and 1/2, respectively, according to the equal (16).

**10. Simulation of consistency of twin PUFs.**

The inconsistent FETs in twin PUFs can be caused by imperfect CNT growth, which includes the existence of broken tubes, chiral change and array misalignment. Firstly, we consider the existence of broken tubes, and assume a tube has a constant and uniform probability to stop growing in every unit distance. The probability of a tube with length large than *L* is given by

, (17)

where *l* is the length of the tube, *α* is the probability of stopping growing in every unit distance, and *L*0 is a very short length and can be divisible by *L*. When *L*0 is close to zero, the limitation of equation (17) is given by

. (18)

According to the equation (18), the average length of CNT array is given by

. (19)

According to the literature, the average length is about 300 μm37, then *α* is equal to 3.33 mm-1. However, *α* can be reduced by optimizing growth condition including proper C:H ratio, steady growth environment, cleaner substrate and so on.

Then we consider the chiral transition between metallic tubes and semiconducting tubes, and assume a tube has a constant and uniform probability to change its chirality in every unit distance. The probability of a tube at a distance *L* having the different charity with its original charity is given by

, (20)

where *β* is the probability of chiral transition in every unit distance, and *L*0 is a very short length and can be divisible by *L*. Because of need extra energy needing to overcome the barrier, the chiral transition is difficult, so we only consider single chiral transition, then equation (20) is simplified as

. (21)

Overall, the probability of a tube at a distance *L* having the same electrical properties with its origin ones is given by

. (22)

The misalignment comes from the defect and dislocation of quartz substrate, containment on the substrate and unsteady growth atmosphere. We use angles between CNTs to measure the misalignment degree, as shown in Fig. S20, and the normalized angle has a small standard deviation of 0.09 °.

The inconsistency can also be caused by the fabrication process, including FET failure and angular deviation between FET channel direction and CNT growth direction. In a mature device fabrication process, the probability of FET failure can be reduced to a very low value, and we assume it caused 1 % decrease in our simulation. In our twin PUFs, the angle between the FET channel direction and CNT growth direction is smaller than 0.05 °.

Overall, we simulated the consistency versus the distance of twin PUFs, as shown in Fig. 4c. The consistency can be largely increased by optimizing the growth of CNT arrays and device fabrication process, as shown in Fig. 4d and Fig. S21, and thus increase the allowable distance of twin PUFs.


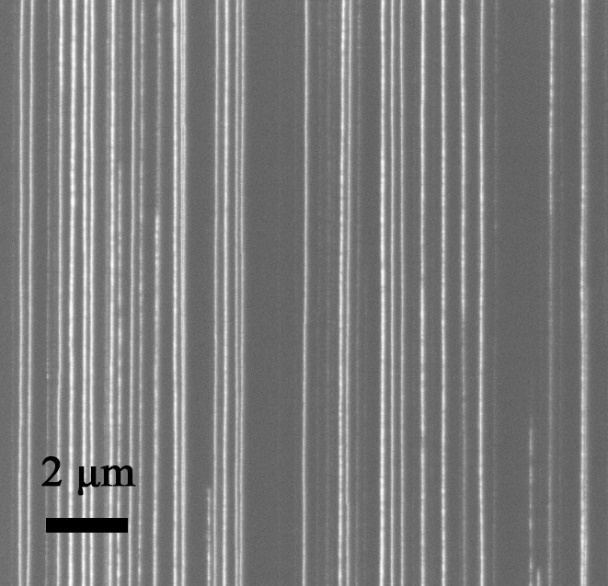

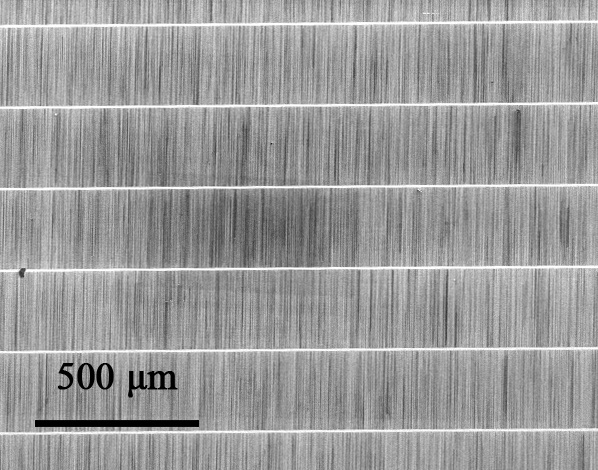


**a**

**b**

Catalysis stripes

**Supplementary Figure 1. SEM image of CVD-grown aligned CNT arrays.** (**a**) SEM image of CNT arrays. The scale bar is 500 μm. (**b**) Zoom-in SEM image of CNT arrays. The scale bar is 2 μm.

**a**

**b**

**Supplementary Figure 2. Randomness of CNT pitches and distribution.** (**a**) CNT pitches versus CNT number. (**b**) Adjacent CNT pitch differences and a normal distribution fit.

**Supplementary Figure 3. Randomness of CNT positions and diameters.** (**a**) AFM image of CNT arrays. (**b**) The extracted height versus positions, and (**c**) CNT diameters versus CNT number.

**a**

**b**

**c**

0

5 nm


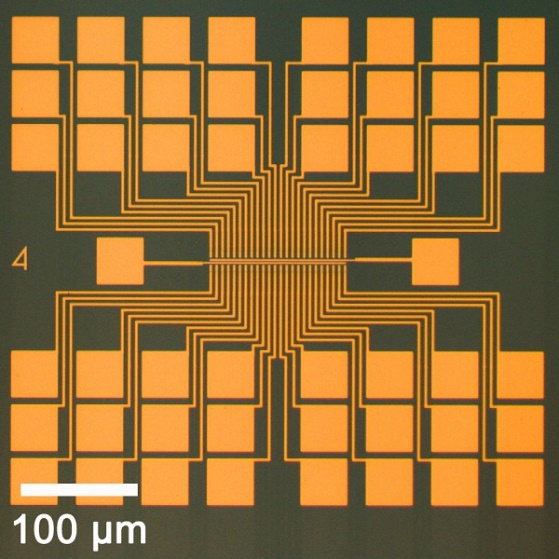

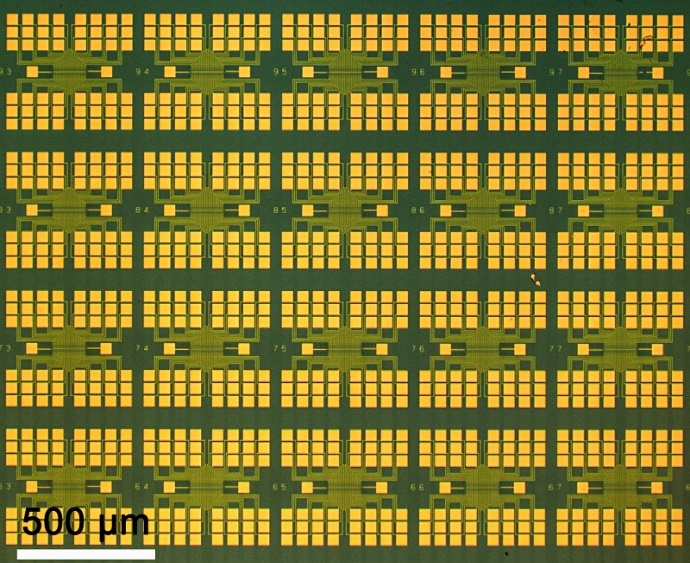


**a**

**b**

**Supplementary Figure 4. Optical images of Twin PUFs.** (**a**) A matrix of 5×4 testing units. The scale bar is 500 μm. (**b**) One testing unit of twin 2×24 PUFs. The scale bar is 100 μm.

**Supplementary Figure 5. Transfer characteristics of 500 back-gate CNT FETs.** The channel width and length are 1 μm and 1 μm, respectively. The source-to-drain voltage is -1.0 V.

**a**

**b**

**c**

**d**

**Supplementary Figure 6. CNT pitches and distribution. (a-d)** Distribution and fitting of CNT pitch of different samples with different densities. The data in (**c**) and (**d**) are extracted from CNT arrays published by other groups34, 39.

**a**

**b**

**c**

**Supplementary Figure 7.** (**a**)Schematic illustrating CNT array and FETs (represented as pairs of short lines) with channel width Wch = 0.5 μm, 1 μm and 2 μm, from the bottom to the top. Average CNT pitch is set at 2±1.5 μm, and MSR is set at 1:2. (**b**) Simulation of ratios of O-, S-, and M-type FETs versus Wch. **(c**) Simulation of ratios of O-, pure S-, pure M-, mixed S/M- and M-type FETs versus Wch.

**Supplementary Figure 8.** Simulation of ratios of O-, S-, and M-type FETs versus Wch for different metallic CNT ratios.

**Supplementary Figure 9.** Simulation of ratios of O-, S-, and M-type FETs versus Wch for different standard deviations of CNT pitches.

**Supplementary Figure 10.** Minimum difference versus metallic CNT ratios and standard deviations of CNT pitches.

**a**

**b**

**Supplementary Figure 11. Extraction of metallic ratio.** (**a**) Transfer characteristic of a CNT FET with channel width of 0.8 mm, Vds=-0.1 V. (**b**) Metallic ratio versus channel width.

**Supplementary Figure 12. Uniformity of CNT PUFs.** (**a**) Overall ratios of M-, O- and S-type FETs. (**b**) Ratios of M-, O- and S-type FETs at different regions.

**a**

**b**

**Supplementary Figure 13.** Maximum combination number comparison of ternary keys and binary keys.

**Supplementary Figure 14.** Normalized inter HD versus key size

**Supplementary Figure 15.** Binary keys generated from ternary bits. Ternary keys are converted into 3200-bit binary keys through successively extracting two types of bits to form three groups of binary keys and then connecting them The order is MO, OS and MS.

**b**

**a**

**Supplementary Figure 16. Influence of temperature on electrical properties of CNT FETs.** (**a**) Transfer characteristics of the same CNT FET at 20 ℃ and 100 ℃. (**b**) Off-state current Ioff comparison of S-type FETs at 20 ℃ and 100 ℃.

**
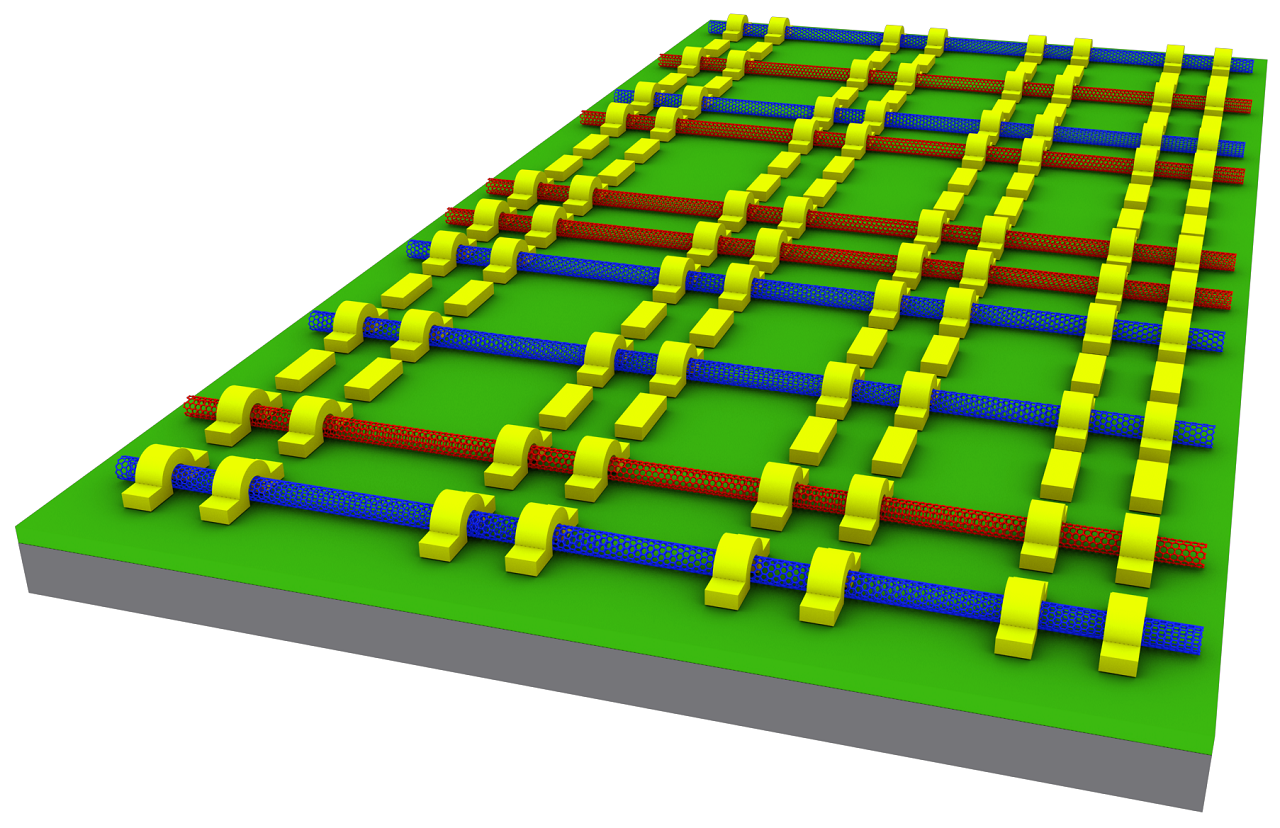
**

**Supplementary Figure 17.** Schematic illustration of multiple identical CNT PUFs fabricated on the same CNT arrays.


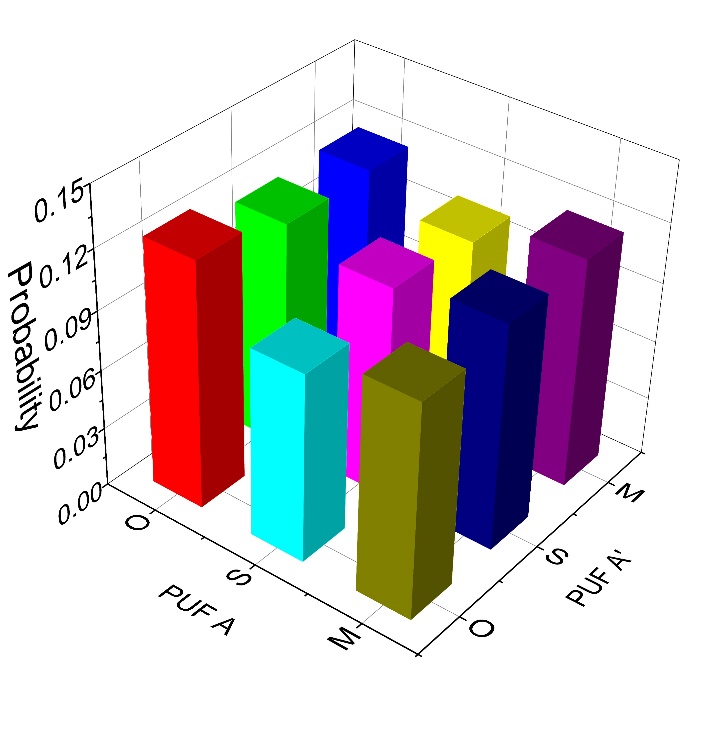


**Supplementary Figure 18.** Electrical type comparison of two independent PUFs (A and A’), showing little correlation between the two PUFs.


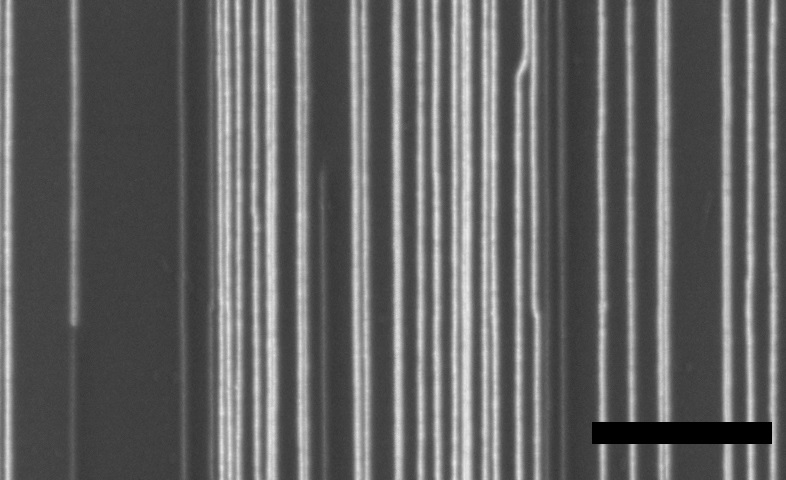


Chiral transition

Broken tubes

Misalignment

**Supplementary Figure 19.** SEM image showing CNT array imperfections, including chiral change, broken tube and misalignment between CNTs within the array. The scale bar is 2 μm.

**Supplementary Figure 20.** Distribution of angles between CNTs.

PUF distance

θ

**Supplementary Figure 21.** Illustration of PUF distance and the angle. The blue and red line represent semiconducting and metallic CNTs, respectively.
